# Supplementary material for: Superhydrophobic flexible conductive PFDT/CB/MXene@Paper for high-efficiency EMI shielding and Joule heating applications
Source: Royal Society of Chemistry journal article supplement (doi:10.1039/d2tc02727e), 2022-01-01
Supplement: d2tc02727e1.pdf [file d2tc02727e1.pdf]

## Supporting Information

### **Superhydrophobic Flexible Conductive PFDT/CB/MXene@Paper for High-Efficient EMI Shielding and Joule Heating Applications**

Qingtao Li, Wenke Yang, Kang Sun, Yan Guo, Hu Liu,\* Chuntai Liu,\* and Changyu Shen

Key Laboratory of Materials Processing and Mold (Zhengzhou University), Ministry of Education; National Engineering Research Center for Advanced Polymer Processing Technology, Zhengzhou University, Zhengzhou, Henan 450002, China

\*: *Correspondence authors*

E-mail address: [liuhu@zzu.edu.cn](mailto:liuhu@zzu.edu.cn) (H. L.); [ctliu@zzu.edu.cn](mailto:ctliu@zzu.edu.cn) (C. L.)

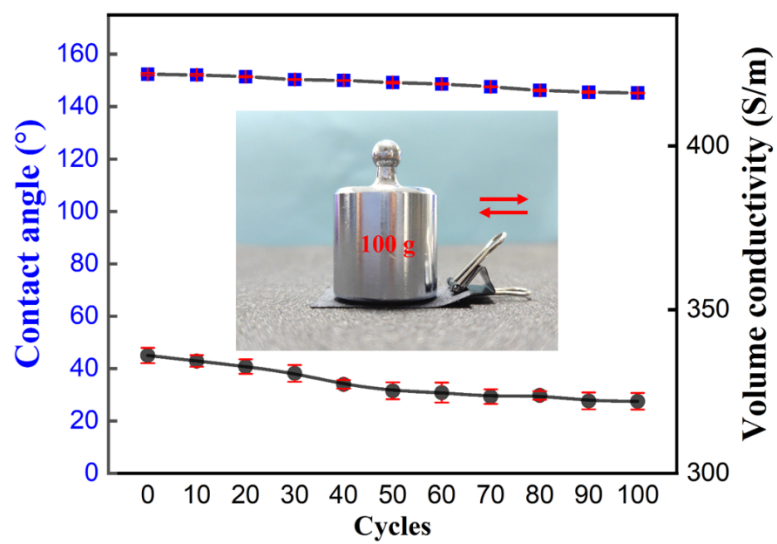

Fig. S1 The variation of WCA and conductivity of PFDT/CB/MXene@Paper with abrasion cycles.
